# Supplementary material
Source: HighWire-hosted journal article supplement (https://www.cmajopen.ca/highwire/filestream/87857/field_highwire_adjunct_files/0/2021-0051-1-at.pdf)
Supplement: 2021-0051-1-at.pdf [file 2021-0051-1-at.pdf]

**Supplementary Table 1: Characteristics of respondents by up-to-date status for colorectal cancer screening**

| Characteristics                                    | FOBT within past 2 years |                    | Colonoscopy/sigmoidoscopy within past 5 years |                      |
|----------------------------------------------------|--------------------------|--------------------|-----------------------------------------------|----------------------|
|                                                    | Yes: % (95% CI)          | No: % (95% CI)     | Yes: % (95% CI)                               | No: % (95% CI)       |
| Age:                                               |                          |                    |                                               |                      |
| 50-59 years                                        | 45.4 (42.3, 48.5)        | 61.1 (58.3, 64.0)  | 45.2 (41.2, 49.1)                             | 57.2 (54.7, 59.6)    |
| 60-74 years                                        | 54.6 (51.5, 57.7)        | 38.9 (36.0, 41.7)  | 54.8 (50.9, 58.8)                             | 41.8 (40.4, 45.3)    |
| Sex:                                               |                          |                    |                                               |                      |
| Female                                             | 47.3 (44.7, 49.8)        | 50.8 (48.6, 52.9)  | 52.3 (48.6, 55.9)                             | 48.24 (46.76, 49.71) |
| Male                                               | 52.7 (50.2, 55.3)        | 49.2 (47.1, 51.4)  | 47.7 (44.6, 51.4)                             | 51.76 (50.28, 53.24) |
| Marital status:                                    |                          |                    |                                               |                      |
| Widowed/divorced/separated or single               | 20.7 (18.7, 22.8)        | 28.0 (25.2, 30.8)  | 22.7 (19.9, 25.5)                             | 25.8 (23.6, 28.1)    |
| Married/common-law                                 | 79.3 (77.2, 81.3)        | 72.0 (69.7, 74.8)  | 77.3 (74.5, 80.0)                             | 74.1 (71.7, 76.5)    |
| Highest education attainment:                      |                          |                    |                                               |                      |
| Less than secondary graduation                     | 10.5 (8.5, 12.4)         | 12.8 (10.6, 15.0)  | 10.7 (8.4, 13.1)                              | 12.3 (10.4, 14.2)    |
| Secondary school education                         | 26.0 (23.2, 28.8)        | 25.2 (22.1, 28.2)  | 23.4 (21.3, 27.4)                             | 25.9 (23.2, 28.6)    |
| Post-secondary certificate, or degree              | 63.5 (60.5, 66.6)        | 62.0 (58.7, 65.3)  | 65.9 (61.4, 68.4)                             | 61.8 (58.9, 64.8)    |
| Total household income:                            |                          |                    |                                               |                      |
| No income or < \$20,000                            | 3.5 (2.6, 4.4)           | 3.6 (2.8, 4.4)     | 3.5 (2.5, 4.5)                                | 3.6 (2.9, 4.3)       |
| \$20,000 to \$39,999                               | 9.8 (8.5, 11.3)          | 10.9 (8.8, 13.1)   | 10.4 (8.1, 12.6)                              | 10.3 (8.7, 11.9)     |
| \$40,000 to \$79,999                               | 26.3 (23.6, 28.9)        | 23.9 (21.3, 26.5)  | 25.6 (24.1, 30.1)                             | 24.2 (21.7, 26.6)    |
| \$80,000 or more                                   | 60.4 (57.5, 63.4)        | 61.6 (58.5, 64.6)  | 61.1 (55.7, 62.5)                             | 60.9 (59.2, 64.6)    |
| Ethnicity:                                         |                          |                    |                                               |                      |
| White                                              | 86.7 (84.0, 89.3)        | 86.3 (83.2, 89.4)  | 91.4 (88.2, 93.1)                             | 84.3 (81.5, 87.2)    |
| Non-white (aboriginal or other visible)            | 13.3 (10.7, 16.0)        | 13.7 (10.6, 16.8)  | 8.6 (6.9, 11.8)                               | 15.7 (12.8, 19.5)    |
| Immigration status:                                |                          |                    |                                               |                      |
| Non-immigrants (Canadian-born)                     | 77.1 (74.2, 80.0)        | 75.9 (72.6, 79.2)  | 80.2 (77.1, 83.3)                             | 74.3 (71.4, 77.3)    |
| Landed immigrants/non-permanents                   | 22.9 (20.0, 25.8)        | 24.1 (20.8, 27.4)  | 19.8 (16.7, 22.9)                             | 25.7 (22.7, 28.6)    |
| Body mass index <sup>a</sup> :                     |                          |                    |                                               |                      |
| Normal (18.5-24.9 kg/m <sup>2</sup> )              | 24.6 (22.0, 27.3)        | 29.3 (26.2, 32.4)  | 28.5 (24.2, 30.9)                             | 26.0 (24.3, 29.7)    |
| Overweight (25.0- 29.9 kg/m <sup>2</sup> )         | 40.6 (37.4, 43.8)        | 41.3 (37.8, 44.7)  | 40.5 (36.8, 44.2)                             | 41.2 (38.1, 44.3)    |
| Obese- class I II, III (≥30.0 kg/m <sup>2</sup> )  | 34.8 (32.6, 37.9)        | 29.4 (26.5, 32.4)  | 30.0 (28.7, 35.3)                             | 32.8 (28.9, 34.6)    |
| Moderate/vigorous physical activity <sup>b</sup> : |                          |                    |                                               |                      |
| <150 min/week (inadequate)                         | 43.4 (40.1, 49.0)        | 45.5 (42.0, 49.0)  | 41.4 (37.8, 45.0)                             | 46.2 (43.1, 49.3)    |
| ≥150 min/week (adequate)                           | 56.6 (53.2, 59.9)        | 54.5 (51.0, 58.0)  | 58.6 (55.0, 62.2)                             | 54.8 (50.7, 56.9)    |
| Smoking status:                                    |                          |                    |                                               |                      |
| Never smokers                                      | 48.4 (45.2, 51.6)        | 43.2 (40.0, 46.4)  | 45.8 (42.1, 49.4)                             | 45.7 (42.8, 48.6)    |
| Current smokers- daily/occasional)                 | 15.9 (13.6, 18.3)        | 23.5 (20.7, 26.3)  | 14.2 (13.7, 18.9)                             | 21.9 (19.5, 24.4)    |
| Past smoker- daily/occasional                      | 35.7 (32.6, 38.8)        | 33.3 (30.1, 36.5)  | 40.0 (34.4, 41.5)                             | 32.4 (29.6, 35.2)    |
| Illicit drug used in past 12 month                 | 5.0 (3.8, 6.1)           | 8.5(3.8, 6.1)      | 5.0 (4.3, 7.8)                                | 7.2 (5.7, 8.7)       |
| General health:                                    |                          |                    |                                               |                      |
| Poor or fair                                       | 13.6 (11.6, 15.5)        | 13.8 (11.5, 16.0)  | 13.3 (11.8, 16.7)                             | 13.2 (11.4, 15.1)    |
| Good                                               | 27.9 (25.0, 30.8)        | 26.0 (23.4, 28.53) | 24.1 (22.9, 29.2)                             | 27.5 (25.2, 29.8)    |
| Very good                                          | 36.8 (33.8, 39.8)        | 37.4 (34.4, 40.5)  | 40.0 (35.4, 42.6)                             | 36.5 (33.7, 39.3)    |
| Excellent                                          | 21.7 (18.6, 24.8)        | 22.8 (20.0, 25.6)  | 21.6 (17.6, 23.7)                             | 22.8 (20.0, 25.6)    |
| Had mammogram in past 2 years (female)             | 84.0 (81.1, 86.5)        | 60.9 (56.3, 65.5)  | 79.9 (77.0, 84.9)                             | 66.2 (61.2, 69.2)    |

Note: CI: confidence interval; FOBT: fecal occult blood test (either guaiac fecal occult blood test or fecal immunochemical test); <sup>a</sup> body mass index was calculated based on international standard; <sup>b</sup> physical activity was defined based on Canadian physical activity guidelines
